# Supplementary material for: Development of a Framework for the Culture of Scientific Research
Source: Atypon-hosted journal article supplement (doi:10.1187/cbe.21-02-0029), 2021-10-22
Supplement: combinedsupmats.pdf [file combinedsupmats.pdf]

# Supplemental Material

CBE—Life Sciences Education

Dewey *et al.*

Development of a Framework for the Culture of Scientific Research and Application to Course-based Undergraduate Research Experiences (Dewey et al.) – Supplemental Materials

Table S1: Details of the 78 manuscripts used to develop the CSR Framework

Table S2: Citations for the Practices of Scientific Research

Table S3: Citations for the Norms/Expectations of Scientific Research

Table S4: Citations for the Values/Beliefs of Scientific Research

Aspects of Biological Research Survey

Table S5: Proportion relevant by career stage

Table S6: Proportion relevant by discipline

Table S7: Proportion relevant by gender identity

Table S8: Proportion relevant by race/ethnicity

Table S9: Proportion relevant by institution type

Table S1: Details of the 78 manuscripts used to develop the CSR Framework. Full citations contained in the manuscript reference list

| Authors          | Year | Type    | Summary                                                                                                                                                                                                                          |
|------------------|------|---------|----------------------------------------------------------------------------------------------------------------------------------------------------------------------------------------------------------------------------------|
| Mitroff          | 1974 | Article | A study of scientists' conformity to Merton's norms which reveals potential counter-norms                                                                                                                                        |
| Mulkay           | 1976 | Article | Essay critiquing the norms and counter-norms of science                                                                                                                                                                          |
| Knorr            | 1977 | Article | Description of a model for scientific success and application of the model to data from a laboratory                                                                                                                             |
| Stehr            | 1978 | Article | A critical examination of the normative structure of scientific practice. In this paper, the author uses the Mertonian norms to define the current status of this theory                                                         |
| Latour & Woolgar | 1979 | Book    | A monograph about a <b>neuroendocrinology</b> lab at the Salk institute and how scientists in this lab work towards producing knowledge                                                                                          |
| Knorr-Cetina     | 1981 | Article | Essay on how scientists produce knowledge, with a focus on constructionism and context-dependency                                                                                                                                |
| Collins          | 1982 | Article | A response written to an article by Thomas Gieryn that describes the norms and rules in science as described through the sociology of science                                                                                    |
| Knorr-Cetina     | 1982 | Article | Paper that critiques economic and social models of science and presents a model of science that is transepistemic                                                                                                                |
| Law & Williams   | 1982 | Article | Analysis of how scientists from <b>chemistry and biochemistry</b> negotiate how to write a paper in the most valuable way                                                                                                        |
| Lynch            | 1982 | Article | Analysis of a transcript to describe the process of critical inquiry in a <b>neuroscience</b> lab                                                                                                                                |
| Zenzen & Restivo | 1982 | Article | Account and discussion of 2 years of scientific work on the morphology of liquids in a <b>colloid chemistry lab</b> ; focus on 'what happened' and the differences between three reported accounts of the work                   |
| Collins          | 1983 | Article | Review of how the sociology of science (or scientific knowledge) has changed over time, the current methods being used, and implications of recent findings                                                                      |
| Knorr-Cetina     | 1983 | Article | Review and synthesis of 6 major studies of laboratory work using ethnographic methods. These studies were in various disciplines: <b>ecology, colloid chemistry, cell biology, molecular biology in plants, and neuroscience</b> |
| Mulkay & Gilbert | 1983 | Article | Recounting of how <b>biologists</b> talk about 'theory' in relation to their experimental work                                                                                                                                   |
| Schmaus          | 1983 | Article | An essay on the norms of science and how fraud and self-interestedness still persist and occur in science                                                                                                                        |
| Smokler          | 1983 | Article | An essay on how the methodological rules the science is governed by are in turn affected by social practices which are governed by norms and rules                                                                               |
| Lynch            | 1985 | Book    | Book describing an ethnography of a <b>neuroscience</b> laboratory where the author focuses on the social basis of the production of accounts in the research                                                                    |
| Fujimura         | 1987 | Article | Presents a framework for 'alignment' and how scientists use this idea to decide on do-able problems to pursue                                                                                                                    |
| Longino          | 1990 | Book    | Book describing the value-ladenness of science through analysis and examples of science in action                                                                                                                                |

|                  |      |              |                                                                                                                                                                                                                   |
|------------------|------|--------------|-------------------------------------------------------------------------------------------------------------------------------------------------------------------------------------------------------------------|
| Collins          | 1992 | Book         | Book about replication and induction in science                                                                                                                                                                   |
| Gooding          | 1992 | Book chapter | Discussion of agency, specifically in the context of experimentation. Provides 4 properties of experimental practice                                                                                              |
| Hacking          | 1992 | Book chapter | Overview of what laboratory sciences are and provides a taxonomy of 'experiment' in laboratory sciences                                                                                                           |
| Mellican         | 1992 | Article      | A paper about fraud in science and how scientists respond to misconduct through the lens of scientific norms and practices                                                                                        |
| Traweek          | 1993 | Book         | Comparison of <b>high-energy physics labs</b> in Japan and the United States                                                                                                                                      |
| Anderson & Louis | 1994 | Article      | Paper exploring how doctoral students in <b>chemistry, civil engineering, microbiology, and sociology</b> are oriented to the norms of academic research                                                          |
| Restivo          | 1994 | Book         | Book exploring the sociology of science, the sociology of objectivity, and the connections between science, objectivity, and human values                                                                         |
| Dunbar           | 1995 | Article      | Description of the cognitive and social processes that are part of scientific discovery and reasoning                                                                                                             |
| Knorr-Cetina     | 1995 | Book chapter | Review of studies within 'laboratory studies'; how they came to be, their findings, and future work to be done                                                                                                    |
| Marks            | 1996 | Article      | An essay on science norms and behaviors and how they relate to the humanities and society                                                                                                                         |
| Lacey            | 1997 | Article      | Paper discussing constitutive values of science, namely which constitutive values should be included in the 'list' for science and whether they can be separated from more general values (e.g. social)           |
| Allchin          | 1999 | Article      | An essay on values in science, specifically epistemic values and cultural values, and how they may be taught in schools                                                                                           |
| Lacey            | 1999 | Article      | Paper proposing six normative principles that guide the values and conduct of science                                                                                                                             |
| Latour           | 1999 | Book         | Book describing Latour's thought on reality and how scientists go from practice to knowledge production                                                                                                           |
| Rai              | 1999 | Article      | A paper describing the norms of science and how they changed as laws related to intellectual property rights and patents emerged                                                                                  |
| Douglas          | 2000 | Article      | Paper discussing how inductive risk leads to non-epistemic values being important when scientists make decisions and interpret data, with examples from <b>toxicology</b>                                         |
| Kieff            | 2000 | Article      | A critique and response to previous work discussing how patents impacted the norms of science                                                                                                                     |
| Buxton           | 2001 | Article      | An ethnographic study of "Sally's Lab" ( <b>molecular biology</b> ) where data on the daily practices of the lab members was collected and interpreted. Results were also connected to science education in K-12. |
| McComas & Olson  | 2002 | Book chapter | Book chapter describing and comparing nature of science elements that are present in eight different standards documents for education                                                                            |

|                       |      |                 |                                                                                                                                                                                                                                                               |
|-----------------------|------|-----------------|---------------------------------------------------------------------------------------------------------------------------------------------------------------------------------------------------------------------------------------------------------------|
| Schwartz et al.       | 2004 | Article         | Study examining potential changes in preservice secondary science teachers' understanding of the nature of science through their participation in a science research internship course                                                                        |
| Tweney                | 2004 | Article         | Describing 'experimental ethnography' as an approach to understand scientific thinking                                                                                                                                                                        |
| Yearley               | 2004 | Book            | Book discussing what makes science special and how it relates to the social sciences                                                                                                                                                                          |
| Koertge               | 2005 | Book            | A book of essays comparing and relating the value of science to the values of a civil society                                                                                                                                                                 |
| Nersessian            | 2006 | Article         | Discusses the integrated nature of cultural and cognitive aspects of science, specifically in the context of problem solving in a <b>biomedical engineering lab</b>                                                                                           |
| Hildebrand            | 2007 | Book chapter    | Book chapter discussing whose values (and voices) are used in the science curriculum and which values ought to be taught                                                                                                                                      |
| Kalleberg             | 2007 | Article         | Paper discussing Merton's ideas about the ethos of science and how they still apply today, along with norms that Merton did not explicitly list                                                                                                               |
| Resnik                | 2007 | Book            | A book about ethical responsibility and money in science                                                                                                                                                                                                      |
| Artigas               | 2008 | Book chapter    | Book chapter describing the values inherent to science practice                                                                                                                                                                                               |
| Macfarlane & Cheng    | 2008 | Article         | Paper discussing three of Merton's norms in the context of today's science                                                                                                                                                                                    |
| Rosenberg             | 2008 | Book chapter    | Book chapter discussing different views of science and how they relate to scientific values (e.g. Baconian views, scientific realism, etc.)                                                                                                                   |
| Schwartz & Lederman   | 2008 | Article         | A study analyzing scientists' views of the nature of science and whether these views differed by discipline ( <b>life sciences, earth and space science, chemistry, physics</b> )                                                                             |
| Tuunainen & Knuuttila | 2008 | Article         | This paper explores how the rules and norms of science at academic institutions are changed or impacted when business activities come into the picture                                                                                                        |
| Zeigler               | 2009 | Article         | Essay about four fundamental values of science                                                                                                                                                                                                                |
| Anderson et al.       | 2010 | Article         | Paper exploring scientists' subscription to the norms proposed by Merton and the counter norms proposed by Mitroff, while proposing four new norm-counter norm pairs. Participants were from <b>biomedical, clinical, biological, and behavioral sciences</b> |
| Ayar & Yalvac         | 2010 | Article         | Review of some ethnographic studies of science, identifying the cultural aspects of science that these studies identify which are not currently part of science education                                                                                     |
| AAAS                  | 2011 | Policy document | A policy document outlining goals for how undergraduate <b>biology</b> education should change and improve (Vision and Change)                                                                                                                                |

|                   |      |              |                                                                                                                                                                                             |
|-------------------|------|--------------|---------------------------------------------------------------------------------------------------------------------------------------------------------------------------------------------|
| Carrier           | 2013 | Article      | Paper discussing the nature of scientific objectivity and how values play a role in maintaining this objectivity in epistemic (or academic) research                                        |
| Djørup & Kappel   | 2013 | Article      | A paper arguing for the applicability of the ‘disinterestedness’ norm to science                                                                                                            |
| Mirando & Damico  | 2013 | Article      | A study exploring teacher’s beliefs about how participation in a research experience impacted their teaching practices                                                                      |
| Tuana             | 2013 | Article      | A paper arguing for philosophy to be a discipline that works with science                                                                                                                   |
| Cao               | 2014 | Article      | Paper discussing the values of modern science and how science in <b>China</b> deviates from these values in the pursuit of Nobel Prize awards                                               |
| Elliot & Resnik   | 2014 | Article      | A paper proposing principles for how scientists should communicate findings when they relate to policy                                                                                      |
| Erduran & Dagher  | 2014 | Book chapter | Book chapter that discusses science as a social-institutional system and presents a framework for applying this view of science to educational contexts                                     |
| Erduran & Dagher  | 2014 | Book chapter | Book chapter reviewing the literature on the aims and values of science and relating them to science education                                                                              |
| Irzik & Nola      | 2014 | Book chapter | Book chapter discussing the Family Resemblance Approach to understanding the Nature of Science                                                                                              |
| Ayar et al.       | 2015 | Article      | This study is a meta-ethnography of three interpretive studies of science                                                                                                                   |
| Evagorou et al.   | 2015 | Article      | Paper arguing for the use of visual representations as epistemic objects when teaching science in order to emphasize how visualization adds to knowledge formation                          |
| Mody              | 2015 | Article      | Essay describing scientific practices beyond those in the lab (administrative, etc.) and how these should be incorporated into science education                                            |
| Sandoval & Redman | 2015 | Article      | A study exploring the contextual nature of scientists’ understanding about the nature of science                                                                                            |
| Gardner           | 2017 | Article      | A study exploring how students’ knowledge of the Nature of Science is impacted by curriculum that explicitly integrates knowledge from <b>biology and chemistry</b> in a laboratory context |
| Ibrahim et al.    | 2017 | Article      | Paper describing the development and validation of the McGill Attainment Value for Inquiry Engagement Survey (MAVIES) with undergraduate students                                           |
| Lancaster et al.  | 2017 | Article      | An exploration of how pre-service teacher’s views of the nature of science might change through reflection and discussions with practicing scientists                                       |
| Baze & Gray       | 2018 | Article      | Paper describing a model-based inquiry activity about <b>evolution</b> and its impact on undergraduate’s modeling abilities                                                                 |
| Davidson & Hughes | 2018 | Article      | Description of the patterns of interactions, common purpose, and communal resources of science from teacher's experiences as spectator novices in labs                                      |

|                   |      |         |                                                                                                                                                                  |
|-------------------|------|---------|------------------------------------------------------------------------------------------------------------------------------------------------------------------|
| Mann              | 2018 | Article | An ethnography of two <b>sensory science</b> experiments in <b>European</b> labs studying flavor perception                                                      |
| Hessels et al.    | 2019 | Article | Case study of four different science labs and how their epistemic cultures differ from each other                                                                |
| Meschitti         | 2019 | Article | An ethnography of peer learning occurring between PhD students during group meetings in a <b>computer science</b> lab in <b>Switzerland</b>                      |
| Peffer & Ramezani | 2019 | Article | Study to compare novice and expert practices in science, specifically <b>biology</b> , to develop an assessment                                                  |
| Heinrich          | 2020 | Article | Review describing how medical science has been fraught with fraud and other issues in recent years, and how returning to the original values of science may help |

*Table S2: Citations for the Practices of Scientific Research*

| Practices                                              | References                                                                                                                                                                                                                                                                                                                                                                                                                                                                                                                          |
|--------------------------------------------------------|-------------------------------------------------------------------------------------------------------------------------------------------------------------------------------------------------------------------------------------------------------------------------------------------------------------------------------------------------------------------------------------------------------------------------------------------------------------------------------------------------------------------------------------|
| Scientists pose questions, hypotheses, and predictions | Allchin, 1999; AAAS, 2011; Artigas, 2008; Ayar & Yalvac, 2010; Baze & Gray, 2018; Buxton, 2001; Dunbar, 1995; Elliot & Resnik, 2014; Erduran & Dagher, 2014a; Evagorou et al., 2015; Hacking, 1992; Ibrahim et al., 2017; Irzik & Nola, 2014; Lacey, 1997; Latour, 1999; Mann, 2018; Peffer & Ramezani, 2019; Restivo, 1994; Rosenberg, 2008; Schmaus, 1983; Tweney, 2004                                                                                                                                                           |
| Scientists plan investigations                         | Allchin, 1999; AAAS, 2011; Ayar & Yalvac, 2010; Buxton, 2001; Carrier, 2013; Douglas, 2000; Dunbar, 1995; Elliot & Resnik, 2014; Erduran & Dagher, 2014a; Evagorou et al., 2015; Fujimura, 1987; Hacking, 1992; Ibrahim et al., 2017; Irzik & Nola, 2014; Knorr-Cetina, 1982; Mann, 2018; Miranda & Damico, 2013; Restivo, 1994; Sandoval & Redman, 2015; Schmaus, 1983                                                                                                                                                             |
| Scientists run investigations                          | Allchin, 1999; AAAS, 2011; Artigas, 2008; Ayar et al., 2015; Ayar & Yalvac, 2010; Buxton, 2001; Carrier, 2013; Davidson & Hughes, 2018; Douglas, 2000; Erduran & Dagher, 2014a; Erduran & Dagher, 2014b; Evagorou et al., 2015; Fujimura, 1987; Gooding, 1992; Hacking, 1992; Hessels et al., 2019; Ibrahim et al., 2017; Irzik & Nola, 2014; Knorr-Cetina, 1995; Latour, 1999; Longino, 1990; Miranda & Damico, 2013; Mann, 2018; Mody, 2015; Peffer & Ramezani, 2019; Rosenberg, 2008; Schmaus, 1983; Tweney, 2004; Yearley, 2004 |
| Scientists analyze data                                | Allchin, 1999; Ayar & Yalvac, 2010; Djørup & Kappel, 2013; Douglas, 2000; Erduran & Dagher, 2014a; Evagorou et al., 2015; Hacking, 1992; Hessels et al., 2019; Ibrahim et al., 2017; Irzik & Nola, 2014; Latour, 1999; Mann, 2018; Miranda & Damico, 2013; Restivo, 1994; Tuana, 2013                                                                                                                                                                                                                                               |
| Scientists evaluate and interpret of data              | Allchin, 1999; AAAS, 2011; Ayar et al., 2015; Buxton, 2001; Carrier, 2013; Douglas, 2000; Elliot & Resnik, 2014; Erduran & Dagher, 2014a; Erduran & Dagher, 2014b; Evagorou et al., 2015; Hacking, 1992; Ibrahim et al., 2017; Irzik & Nola, 2014; Knorr-Cetina, 1981; Koertge, 2005; Latour, 1999; Longino, 1990; Lynch, 1982; Mody, 2015; Restivo, 1994; Tweney, 2004; Yearley, 2004                                                                                                                                              |



|                                                                     |                                                                                                                                                                                                                                                                                                                                                                                                                                                                                                                                                                        |
|---------------------------------------------------------------------|------------------------------------------------------------------------------------------------------------------------------------------------------------------------------------------------------------------------------------------------------------------------------------------------------------------------------------------------------------------------------------------------------------------------------------------------------------------------------------------------------------------------------------------------------------------------|
| <p>Scientists generate arguments, explanations, and conclusions</p> | <p>Baze &amp; Gray, 2018; Buxton, 2001; Carrier, 2013; Erduran &amp; Dagher, 2014a; Evagorou et al., 2015; Ibrahim et al., 2017; Latour &amp; Woolgar, 1979; Miranda &amp; Damico, 2013; Mody, 2015; Peffer &amp; Ramezani, 2019</p>                                                                                                                                                                                                                                                                                                                                   |
| <p>Scientists negotiate and debate</p>                              | <p>Allchin, 1999; Ayar et al., 2015; Ayar &amp; Yalvac, 2010; Baze &amp; Gray, 2018; Carrier, 2013; Collins, 1983; Erduran &amp; Dagher, 2014b; Evagorou et al., 2015; Hacking, 1992; Ibrahim et al., 2017; Kalleberg, 2007; Knorr-Cetina, 1995; Koertge, 2005; Latour, 1999; Latour &amp; Woolgar, 1979; Marks, 1996; Meschitti, 2019; Miranda &amp; Damico, 2013; Mody, 2015</p>                                                                                                                                                                                     |
| <p>Scientists produce and use representations of phenomena</p>      | <p>Collins, 1983; Evagorou et al., 2015; Latour &amp; Woolgar, 1979; Mody, 2015</p>                                                                                                                                                                                                                                                                                                                                                                                                                                                                                    |
| <p>Scientists develop and use models</p>                            | <p>AAAS, 2011; Baze &amp; Gray, 2018; Carrier, 2013; Douglas, 2000; Evagorou et al., 2015; Hacking, 1992; Ibrahim et al., 2017; Irzik &amp; Nola, 2014; Mann, 2018; Nersessian, 2006</p>                                                                                                                                                                                                                                                                                                                                                                               |
| <p>Scientists apply and use computational approaches</p>            | <p>AAAS, 2011; Evagorou et al., 2015; Ibrahim et al., 2017; Mann, 2018; Miranda &amp; Damico, 2013; Restivo, 1994; Tuana, 2013</p>                                                                                                                                                                                                                                                                                                                                                                                                                                     |
| <p>Scientists obtain and evaluate information</p>                   | <p>Davidson &amp; Hughes, 2018; Evagorou et al., 2015; Hacking, 1992; Ibrahim et al., 2017; Irzik &amp; Nola, 2014; Meschitti, 2019; Miranda &amp; Damico, 2013; Mody, 2015; Peffer &amp; Ramezani, 2019</p>                                                                                                                                                                                                                                                                                                                                                           |
| <p>Scientists communicate</p>                                       | <p>Anderson et al., 2010; Ayar et al., 2015; Ayar &amp; Yalvac, 2010; Cao, 2014; Davidson &amp; Hughes, 2018; Djørup &amp; Kappel, 2013; Elliot &amp; Resnik, 2014; Erduran &amp; Dagher, 2014a; Erduran &amp; Dagher, 2014b; Evagorou et al., 2015; Gardner, 2017; Hacking, 1992; Ibrahim et al., 2017; Irzik &amp; Nola, 2014; Kalleberg, 2007; Koertge, 2005; Lancaster et al., 2017; Mann, 2018; Marks, 1996; McComas &amp; Olson, 2002; Meschitti, 2019; Miranda &amp; Damico, 2013; Mody, 2015; Schmaus, 1983; Tuunainen &amp; Knuuttila, 2008; Tweney, 2004</p> |

---

Scientists work in teams

Baze & Gray, 2018; Dunbar, 1995; Erduran & Dagher, 2014b; Evagorou et al., 2015; Hessels et al., 2019; Irzik & Nola, 2014; Knorr-Cetina, 1982; Meschitti, 2019; Miranda & Damico, 2013; Mody, 2015; Zenzen & Restivo, 1982

---

*Table S3: Citations for the Norms/Expectations of Scientific Research*

| Norms/Expectations                                                                              | References                                                                                                                                                                                                                                                                                                                                                                                                                                                                                                                                                                                                                                                                                                                                                                                                                                                                                          |
|-------------------------------------------------------------------------------------------------|-----------------------------------------------------------------------------------------------------------------------------------------------------------------------------------------------------------------------------------------------------------------------------------------------------------------------------------------------------------------------------------------------------------------------------------------------------------------------------------------------------------------------------------------------------------------------------------------------------------------------------------------------------------------------------------------------------------------------------------------------------------------------------------------------------------------------------------------------------------------------------------------------------|
| <p>Scientists aims to be objective, but are influenced by their prior knowledge and beliefs</p> | <p>Allchin, 1999; Anderson et al., 2010; Anderson &amp; Louis, 1994; Artigas, 2008; Ayar &amp; Yalvac, 2010; Cao, 2014; Carrier, 2013; Collins, 1982; Djørup &amp; Kappel, 2013; Douglas, 2000; Elliot &amp; Resnik, 2014; Erduran &amp; Dagher, 2014a; Erduran &amp; Dagher, 2014b; Gardner, 2017; Hildebrand, 2007; Irzik &amp; Nola, 2014; Kalleberg, 2007; Kieff, 2000; Knorr-Cetina, 1995; Koertge, 2005; Lacey, 1999; Longino, 1990; Lynch, 1985; Macfarlane &amp; Cheng, 2008; Marks, 1996; McComas &amp; Olson, 2002; Mellican, 1992; Mitroff, 1974; Mulkay, 1976; Mulkay &amp; Gilbert, 1983; Resnik, 2007; Restivo, 1994; Sandoval &amp; Redman, 2015; Schmaus, 1983; Schwartz &amp; Lederman, 2008; Smokler, 1983; Stehr, 1978; Tuana, 2013; Tuunainen &amp; Knuuttila, 2008; Yearley, 2004</p>                                                                                          |
| <p>Science aims for integrity</p>                                                               | <p>Allchin, 1999; Anderson et al., 2010; Anderson &amp; Louis, 1994; Artigas, 2008; Ayar &amp; Yalvac, 2010; Baze &amp; Gray, 2018; Buxton, 2001; Cao, 2014; Carrier, 2013; Collins, 1982, 1983; Djørup &amp; Kappel, 2013; Douglas, 2000; Elliot &amp; Resnik, 2014; Erduran &amp; Dagher, 2014a; Erduran &amp; Dagher, 2014b; Heinrich, 2020; Hildebrand, 2007; Irzik &amp; Nola, 2014; Kalleberg, 2007; Kieff, 2000; Koertge, 2005; Lacey, 1997; Latour, 1999; Latour &amp; Woolgar, 1979; Longino, 1990; Macfarlane &amp; Cheng, 2008; Mann, 2018; Marks, 1996; McComas &amp; Olson, 2002; Mellican, 1992; Mitroff, 1974; Mody, 2015; Mulkay, 1976; Mulkay &amp; Gilbert, 1983; Rai, 1999; Resnik, 2007; Restivo, 1994; Rosenberg, 2008; Schmaus, 1983; Smokler, 1983; Stehr, 1978; Tuunainen &amp; Knuuttila, 2008; Tweney, 2004; Yearley, 2004; Zeigler, 2009; Zenzen &amp; Restivo, 1982</p> |
| <p>Scientific work should be repeated or repeatable</p>                                         | <p>Allchin, 1999; Buxton, 2001; Carrier, 2013; Collins, 1982, 1983, 1992; Davidson &amp; Hughes, 2018; Erduran &amp; Dagher, 2014a; Heinrich, 2020; Irzik &amp; Nola, 2014; Longino, 1990; Mellican, 1992; McComas &amp; Olson, 2002; Miranda &amp; Damico, 2013; Rosenberg, 2008; Tweney, 2004</p>                                                                                                                                                                                                                                                                                                                                                                                                                                                                                                                                                                                                 |
| <p>Scientific work is often peer reviewed</p>                                                   | <p>Allchin, 1999; Anderson et al., 2010; Ayar &amp; Yalvac, 2010; Cao, 2014; Irzik &amp; Nola, 2014; Knorr, 1977; Knorr-Cetina, 1982; Longino, 1990; McComas &amp; Olson, 2002; Mellican, 1992; Mody, 2015; Smokler, 1983</p>                                                                                                                                                                                                                                                                                                                                                                                                                                                                                                                                                                                                                                                                       |

|                                                                                                 |                                                                                                                                                                                                                                                                                                                                                                                                                                                                                                                                                                         |
|-------------------------------------------------------------------------------------------------|-------------------------------------------------------------------------------------------------------------------------------------------------------------------------------------------------------------------------------------------------------------------------------------------------------------------------------------------------------------------------------------------------------------------------------------------------------------------------------------------------------------------------------------------------------------------------|
| <p>Scientists must publish their work as a measure of success, often leading to competition</p> | <p>Anderson et al., 2010; Artigas, 2008; Ayar et al., 2015; Ayar &amp; Yalvac, 2010; Buxton, 2001; Carrier, 2013; Cao, 2014; Djørup &amp; Kappel, 2013; Erduran &amp; Dagher, 2014a; Erduran &amp; Dagher, 2014b; Hessels et al., 2019; Hildebrand, 2007; Irzik &amp; Nola, 2014; Kalleberg, 2007; Knorr, 1977; Knorr-Cetina, 1982; Koertge, 2005; Lacey, 1997, 1999; Law &amp; Williams, 1982; Macfarlane &amp; Cheng, 2008; Marks, 1996; M. J. Mulkay, 1976; Rai, 1999; Resnik, 2007; Restivo, 1994; Rosenberg, 2008; Schmaus, 1983; Traweek, 1993; Yearley, 2004</p> |
| <p>Science is often collaborative</p>                                                           | <p>Allchin, 1999; AAAS, 2011; Ayar &amp; Yalvac, 2010; Baze &amp; Gray, 2018; Buxton, 2001; Cao, 2014; Carrier, 2013; Davidson &amp; Hughes, 2018; Erduran &amp; Dagher, 2014b; Gardner, 2017; Hildebrand, 2007; Irzik &amp; Nola, 2014; Kalleberg, 2007; Knorr-Cetina, 1982, 1983; Koertge, 2005; Lancaster et al., 2017; Latour, 1999; Longino, 1990; Lynch, 1982, 1985; Mann, 2018; McComas &amp; Olson, 2002; Mody, 2015; Rai, 1999; Restivo, 1994; Sandoval &amp; Redman, 2015; Zeigler, 2009</p>                                                                  |
| <p>Scientists should have freedom and independence</p>                                          | <p>Anderson et al., 2010; Anderson &amp; Louis, 1994; Ayar et al., 2015; Buxton, 2001; Cao, 2014; Erduran &amp; Dagher, 2014b; Fujimura, 1987; Hessels et al., 2019; Irzik &amp; Nola, 2014; Kieff, 2000; Koertge, 2005; Lacey, 1997; Lynch, 1985; Macfarlane &amp; Cheng, 2008; McComas &amp; Olson, 2002; M. J. Mulkay, 1976; Nersessian, 2006; Rai, 1999; Resnik, 2007; Restivo, 1994; Sandoval &amp; Redman, 2015; Smokler, 1983; Stehr, 1978; Traweek, 1993; Tuana, 2013; Yearley, 2004; Zenzen &amp; Restivo, 1982</p>                                            |
| <p>Scientists must be persistent and resilient</p>                                              | <p>Ayar et al., 2015; Collins, 1983; Davidson &amp; Hughes, 2018; Evagorou et al., 2015; Miranda &amp; Damico, 2013; Tweney, 2004; Zenzen &amp; Restivo, 1982</p>                                                                                                                                                                                                                                                                                                                                                                                                       |
| <p>Scientists must be open to new ideas</p>                                                     | <p>Allchin, 1999; Anderson &amp; Louis, 1994; Anderson et al., 2010; Cao, 2014; Collins, 1982; Djørup &amp; Kappel, 2013; Dunbar, 1995; Erduran &amp; Dagher, 2014b; Gooding, 1992; Irzik &amp; Nola, 2014; Kalleberg, 2007; Kieff, 2000; Koertge, 2005; Lynch, 1982; Macfarlane &amp; Cheng, 2008; Marks, 1996; McComas &amp; Olson, 2002; Mellican, 1992; Mitroff, 1974; M. J. Mulkay, 1976; Schmaus, 1983; Smokler, 1983; Stehr, 1978; Tuunainen &amp; Knuuttila, 2008; Yearley, 2004; Zeigler, 2009</p>                                                             |

*Table S4: Citations for the Values/Beliefs of Scientific Research*

| Values/Beliefs                                                                   | References                                                                                                                                                                                                                                                                                                                                                                                                                                                                                                                                                                      |
|----------------------------------------------------------------------------------|---------------------------------------------------------------------------------------------------------------------------------------------------------------------------------------------------------------------------------------------------------------------------------------------------------------------------------------------------------------------------------------------------------------------------------------------------------------------------------------------------------------------------------------------------------------------------------|
| Science is defined by a desire to discover new knowledge about the natural world | Allchin, 1999; Anderson et al., 2010; Anderson & Louis, 1994; Artigas, 2008; Ayar et al., 2015; Ayar & Yalvac, 2010; Cao, 2014; Carrier, 2013; Collins, 1982; Davidson & Hughes, 2018; Djørup & Kappel, 2013; Heinrich, 2020; Irzik & Nola, 2014; Kalleberg, 2007; Kieff, 2000; Koertge, 2005; Lacey, 1997; Macfarlane & Cheng, 2008; Marks, 1996; McComas & Olson, 2002; Mellican, 1992; Mitroff, 1974; Mulkay, 1976; Rai, 1999; Rosenberg, 2008; Sandoval & Reman, 2015; Schmaus, 1983; Smokler, 1983; Stehr, 1978; Tuunainen & Knuuttila, 2008; Yearley, 2004; Zeigler, 2009 |
| Science is defined by its requirement for empirical evidence                     | Ayar & Yalvac, 2010; Carrier, 2013; Gardner, 2017; Irzik & Nola, 2014; Koertge, 2005; Lacey, 1997; McComas & Olson, 2002; Resnik, 2007; Sandoval & Redman, 2015; Schwartz & Lederman, 2008; Schwartz et al., 2004                                                                                                                                                                                                                                                                                                                                                               |
| Science is not all-knowing                                                       | Allchin, 1999; Ayar & Yalvac, 2010; Cao, 2014; Davidson & Hughes, 2018; Kalleberg, 2007; Lancaster et al., 2017; McComas & Olson, 2002; Mulkay, 1976                                                                                                                                                                                                                                                                                                                                                                                                                            |
| Science is defined by the production of durable but tentative knowledge          | Ayar & Yalvac, 2010; Gardner, 2017; Irzik & Nola, 2014; Lancaster et al., 2017; Marks, 1996; McComas & Olson, 2002; Rosenberg, 2008; Sandoval & Redman, 2015; Schwartz & Lederman, 2008; Schwartz et al., 2004                                                                                                                                                                                                                                                                                                                                                                  |
| Science places importance on curiosity, imagination, and creativity              | Artigas, 2008; Ayar & Yalvac, 2010; Davidson & Hughes, 2018; Gardner, 2017; Hildebrand, 2007; Irzik & Nola, 2014; Koertge 2005; Lancaster et al., 2017; McComas & Olson, 2002; Schwartz & Lederman, 2008; Schwartz et al., 2004; Zeigler, 2009                                                                                                                                                                                                                                                                                                                                  |
| Science is defined by the use of a variety of methods                            | Ault & Dodick, 2010; Carrier, 2013; Gardner, 2017; Irzik & Nola, 2014; Lacey, 1999; McComas & Olson, 2002; Sandoval & Redman, 2015                                                                                                                                                                                                                                                                                                                                                                                                                                              |

|                                                                        |                                                                                                                                                                                                                                                                                                                                                                                                                                                                                           |
|------------------------------------------------------------------------|-------------------------------------------------------------------------------------------------------------------------------------------------------------------------------------------------------------------------------------------------------------------------------------------------------------------------------------------------------------------------------------------------------------------------------------------------------------------------------------------|
| <p>Science is influenced by and contributes to society and culture</p> | <p>Allchin, 1999; Artigas, 2008; Ayar &amp; Yalvac, 2010; Cao, 2014; Carrier, 2013; Davidson &amp; Hughes, 2018; Djørup &amp; Kappel, 2013; Erduran &amp; Dagher, 2014a; Erduran &amp; Dagher, 2014b; Gardner, 2017; Hessels et al., 2019; Irzik &amp; Nola, 2014; Knorr-Cetina, 1983; Lacey, 1999; Mann, 2018; McComas &amp; Olson, 2002; Sandoval &amp; Redman, 2015; Schmaus, 1983; Schwartz &amp; Lederman, 2008; Schwartz et al., 2004; Smokler, 1983; Tuana, 2013; Tweney, 2004</p> |
| <p>Science builds on what has gone before</p>                          | <p>Ayar et al., 2015; Knorr, 1977; Knorr-Cetina, 1981, 1982; McComas &amp; Olson, 2002; Sandoval &amp; Redman, 2015</p>                                                                                                                                                                                                                                                                                                                                                                   |
| <p>Science is defined as constructive and complex</p>                  | <p>Ayar et al., 2015; Carrier, 2013; Erduran &amp; Dagher, 2014a; Gooding, 1992; Hildebrand, 2007; Knorr-Cetina, 1981, 1983; Lacey, 1997; Latour, 1999; Rodenberg, 2008; Sandoval &amp; Redman, 2015</p>                                                                                                                                                                                                                                                                                  |

# Aspects of Biological Research Survey

In which field(s) have you participated in the process of biological research? Check all that apply

- Ecology
  - Evolution
  - Animal Behavior
  - Molecular biology
  - Cell biology
  - Developmental biology
  - Biochemistry
  - Genetics
  - Plant biology
  - Microbial biology
  - Computational biology
  - Other (please specify below) \_\_\_\_\_
-

What is your career stage?

- Graduate student
  - Postdoctoral researcher
  - Assistant Professor
  - Associate Professor
  - Professor
  - Other (please specify below) \_\_\_\_\_
- 

Do you currently participate in the process of biological research?

- Yes
  - No
- 

*Display This Question:*

*If Do you currently participate in the process of biological research? = Yes*

How many years have you been participating in the process of biology research?

- 0-2 years
  - 3-5 years
  - 6-10 years
  - 10+ years
- 

*Display This Question:*

*If Do you currently participate in the process of biological research? = No*



How many years has it been since you participated in the process of biological research?

- 0-2 years
  - 3-5 years
  - 6-10 years
  - 10+ years
- 

*Display This Question:*

*If Do you currently participate in the process of biological research? = No*

For how many years did you participate in the process of biological research?

- 0-2 years
- 3-5 years
- 6-10 years
- 10+ years

Thinking over the entirety of your career as a biological researcher, which of the following aspects have been relevant to your experience(s)?

|                                                                          | Relevant              | Not relevant          |
|--------------------------------------------------------------------------|-----------------------|-----------------------|
| Biological research is often collaborative                               | <input type="radio"/> | <input type="radio"/> |
| Biological researchers should be open to new ideas                       | <input type="radio"/> | <input type="radio"/> |
| Biological researchers run investigations                                | <input type="radio"/> | <input type="radio"/> |
| Biological research involves the discovery of new knowledge              | <input type="radio"/> | <input type="radio"/> |
| Biological investigations should be repeated or repeatable               | <input type="radio"/> | <input type="radio"/> |
| Biological research involves curiosity, imagination, and creativity      | <input type="radio"/> | <input type="radio"/> |
| Biological researchers generate arguments, explanations, and conclusions | <input type="radio"/> | <input type="radio"/> |
| Biological knowledge is durable but subject to change                    | <input type="radio"/> | <input type="radio"/> |
| Biological researchers communicate results and new knowledge to others   | <input type="radio"/> | <input type="radio"/> |
| Biological research cannot answer all questions                          | <input type="radio"/> | <input type="radio"/> |

---

Thinking over the entirety of your career as a biological researcher, which of the following aspects have been relevant to your experience(s)?

|                                                                                                           | Relevant              | Not relevant          |
|-----------------------------------------------------------------------------------------------------------|-----------------------|-----------------------|
| Biological research is influenced by and contributes to society and culture                               | <input type="radio"/> | <input type="radio"/> |
| Biological researchers plan investigations                                                                | <input type="radio"/> | <input type="radio"/> |
| Biological researchers aim to be objective, but their prior knowledge and beliefs can impact the research | <input type="radio"/> | <input type="radio"/> |
| Biological researchers analyze data                                                                       | <input type="radio"/> | <input type="radio"/> |
| Biological researchers pose questions, hypotheses, and predictions                                        | <input type="radio"/> | <input type="radio"/> |
| Biological researchers read carefully, so pick Not Relevant for this aspect                               | <input type="radio"/> | <input type="radio"/> |
| Biological researchers aim for integrity in their work                                                    | <input type="radio"/> | <input type="radio"/> |
| Biological researchers apply and use computational approaches                                             | <input type="radio"/> | <input type="radio"/> |
| Biological researchers must be persistent and resilient, because encountering difficulties is normal      | <input type="radio"/> | <input type="radio"/> |
| Biological researchers obtain and evaluate information                                                    | <input type="radio"/> | <input type="radio"/> |
| Biological researchers must publish their work as a measure of success, often leading to competition      | <input type="radio"/> | <input type="radio"/> |

---

Thinking over the entirety of your career as a biological researcher, which of the following aspects have been relevant to your experience(s)?

|                                                                | Relevant              | Not relevant          |
|----------------------------------------------------------------|-----------------------|-----------------------|
| Biological research is constructive and complex                | <input type="radio"/> | <input type="radio"/> |
| Biological researchers develop and use models                  | <input type="radio"/> | <input type="radio"/> |
| Biological research involves academic freedom and independence | <input type="radio"/> | <input type="radio"/> |
| Biological research requires empirical evidence                | <input type="radio"/> | <input type="radio"/> |
| Biological researchers evaluate and interpret data             | <input type="radio"/> | <input type="radio"/> |
| Biological investigations can use a variety of methods         | <input type="radio"/> | <input type="radio"/> |
| Biological researchers often work together in teams            | <input type="radio"/> | <input type="radio"/> |
| Biological research builds on what has gone before             | <input type="radio"/> | <input type="radio"/> |
| Biological researchers produce and use representations         | <input type="radio"/> | <input type="radio"/> |
| Biological research is often peer reviewed                     | <input type="radio"/> | <input type="radio"/> |
| Biological researchers negotiate and debate                    | <input type="radio"/> | <input type="radio"/> |

---

Q25 Do you have any comments to share about deciding whether the aspects were relevant or not to your experiences?

---

---

---

---

---

Q10 If there are any other aspects that have been relevant to your experience(s) as a biological researcher, please list them below:

---

---

---

---

---

To ensure we have diverse identities represented in our data, we are collecting demographic information regarding your gender identity, race/ethnicity, and institution type.

-----

Do you identify as transgender?

- Yes
  - No
  - Prefer not to disclose
-

What gender do you identify with? Check all that apply

Woman

Man

Non-binary

Agender

Gender non-conforming

Genderfluid

Prefer not to disclose

Category/identity not listed above (please specify below)

---

---

What race and/or ethnicities do you identify with? Check all that apply

- American Indian or Alaska Native
  - Asian
  - Black or African American
  - Middle Eastern or North African
  - Native Hawaiian or Other Pacific Islander
  - White (of Hispanic, Latino, or Spanish origin)
  - White (not of Hispanic, Latino, or Spanish origin)
  - Multiethnic
  - Prefer not to disclose
  - Race and/or ethnicity not listed above (please specify below)
- 

What type of institution are you associated with? Check all that apply

- Community College
- Primarily undergraduate-serving institution (PUI)
- Minority-serving institution (HBCU, HSI, etc.)
- R1 doctorate-granting university
- R2 or R3 doctorate-granting university
- Masters-granting university
- Other (please specify below) \_\_\_\_\_

Table S5: Proportion relevant by career stage

| Category            | Aspect                                        | Career Stage            |                 |                       |                       |                  |              |
|---------------------|-----------------------------------------------|-------------------------|-----------------|-----------------------|-----------------------|------------------|--------------|
|                     |                                               | Graduate Student (n=51) | Post Doc (n=19) | Assistant Prof (n=23) | Associate Prof (n=20) | Professor (n=22) | Other (n=26) |
| Practices           | Pose questions                                | 98%                     | 100%            | 100%                  | 100%                  | 100%             | 100%         |
|                     | Plan investigations                           | 100%                    | 95%             | 100%                  | 95%                   | 100%             | 96%          |
|                     | Run investigations                            | 88%                     | 79%             | 100%                  | 90%                   | 100%             | 96%          |
|                     | Analyze data                                  | 100%                    | 100%            | 100%                  | 100%                  | 100%             | 96%          |
|                     | Evaluate and interpret data                   | 100%                    | 100%            | 100%                  | 100%                  | 100%             | 100%         |
|                     | Generate arguments, explanations, conclusions | 94%                     | 95%             | 100%                  | 95%                   | 100%             | 100%         |
|                     | Negotiate and debate                          | 77%                     | 68%             | 78%                   | 85%                   | 77%              | 92%          |
|                     | Produce representations                       | 86%                     | 74%             | 91%                   | 95%                   | 77%              | 85%          |
|                     | Develop and use models                        | 92%                     | 100%            | 96%                   | 95%                   | 91%              | 92%          |
|                     | Computational approaches                      | 88%                     | 90%             | 91%                   | 85%                   | 91%              | 89%          |
|                     | Obtain and evaluate info                      | 100%                    | 100%            | 100%                  | 100%                  | 96%              | 100%         |
|                     | Communication                                 | 94%                     | 100%            | 100%                  | 100%                  | 100%             | 100%         |
| Teamwork            | 90%                                           | 100%                    | 100%            | 95%                   | 100%                  | 100%             |              |
| Norms/ Expectations | Objectivity                                   | 96%                     | 95%             | 91%                   | 95%                   | 96%              | 100%         |
|                     | Integrity                                     | 98%                     | 95%             | 96%                   | 100%                  | 100%             | 100%         |
|                     | Repeat investigations                         | 92%                     | 100%            | 96%                   | 100%                  | 100%             | 96%          |
|                     | Peer reviewed                                 | 100%                    | 100%            | 100%                  | 100%                  | 100%             | 96%          |
|                     | Publish as success                            | 86%                     | 95%             | 87%                   | 85%                   | 82%              | 85%          |
|                     | Collaborative                                 | 94%                     | 95%             | 100%                  | 100%                  | 100%             | 96%          |
|                     | Freedom and independence                      | 73%                     | 90%             | 87%                   | 95%                   | 91%              | 73%          |
|                     | Persistent and resilient                      | 96%                     | 95%             | 100%                  | 95%                   | 96%              | 100%         |
| Open to new ideas   | 98%                                           | 100%                    | 100%            | 100%                  | 100%                  | 100%             |              |
| Values/ Beliefs     | Discovery                                     | 94%                     | 100%            | 100%                  | 100%                  | 100%             | 96%          |
|                     | Empirical evidence                            | 90%                     | 100%            | 96%                   | 100%                  | 96%              | 92%          |
|                     | Cannot answer all questions                   | 90%                     | 100%            | 96%                   | 90%                   | 91%              | 89%          |
|                     | Durable but subject to change                 | 94%                     | 84%             | 100%                  | 100%                  | 100%             | 100%         |
|                     | Curiosity/imagination                         | 90%                     | 100%            | 100%                  | 100%                  | 100%             | 100%         |
|                     | Variety of methods                            | 98%                     | 100%            | 96%                   | 100%                  | 100%             | 100%         |
|                     | Influence by/contributes to society           | 88%                     | 90%             | 83%                   | 80%                   | 100%             | 100%         |
|                     | Builds on what has gone before                | 98%                     | 100%            | 100%                  | 100%                  | 100%             | 100%         |
|                     | Constructive and complex                      | 98%                     | 100%            | 100%                  | 90%                   | 96%              | 100%         |



Table S5 note: The 'Other' category includes career positions such as lecturers, staff, lab managers or coordinators, and people who are in-between positions or left academia

Table S6: Proportion relevant by discipline

| Category               | Aspect                                        | Discipline     |                 |                   |                      |                |                |                 |
|------------------------|-----------------------------------------------|----------------|-----------------|-------------------|----------------------|----------------|----------------|-----------------|
|                        |                                               | EEB<br>(n=122) | MCDBG<br>(n=58) | Biochem<br>(n=12) | PlantMicro<br>(n=48) | Comp<br>(n=13) | Neuro<br>(n=7) | Other<br>(n=26) |
| Practices              | Pose questions                                | 100%           | 100%            | 100%              | 100%                 | 100%           | 100%           | 96%             |
|                        | Plan investigations                           | 98%            | 98%             | 100%              | 100%                 | 100%           | 100%           | 100%            |
|                        | Run investigations                            | 91%            | 93%             | 92%               | 92%                  | 100%           | 100%           | 92%             |
|                        | Analyze data                                  | 100%           | 100%            | 100%              | 98%                  | 100%           | 100%           | 100%            |
|                        | Evaluate and interpret data                   | 100%           | 100%            | 100%              | 100%                 | 100%           | 100%           | 100%            |
|                        | Generate arguments, explanations, conclusions | 97%            | 98%             | 92%               | 100%                 | 100%           | 86%            | 100%            |
|                        | Negotiate and debate                          | 76%            | 79%             | 83%               | 75%                  | 77%            | 86%            | 81%             |
|                        | Produce representations                       | 82%            | 88%             | 92%               | 88%                  | 85%            | 86%            | 96%             |
|                        | Develop and use models                        | 92%            | 97%             | 83%               | 92%                  | 100%           | 100%           | 96%             |
|                        | Computational approaches                      | 92%            | 90%             | 100%              | 90%                  | 100%           | 86%            | 85%             |
|                        | Obtain and evaluate info                      | 99%            | 100%            | 100%              | 100%                 | 92%            | 100%           | 100%            |
|                        | Communication                                 | 98%            | 97%             | 100%              | 98%                  | 100%           | 100%           | 100%            |
|                        | Teamwork                                      | 95%            | 95%             | 100%              | 94%                  | 100%           | 100%           | 100%            |
| Norms/<br>Expectations | Objectivity                                   | 95%            | 98%             | 100%              | 96%                  | 85%            | 100%           | 92%             |
|                        | Integrity                                     | 98%            | 97%             | 100%              | 98%                  | 100%           | 100%           | 100%            |
|                        | Repeat investigations                         | 95%            | 100%            | 100%              | 98%                  | 100%           | 100%           | 100%            |
|                        | Peer reviewed                                 | 99%            | 100%            | 100%              | 100%                 | 100%           | 100%           | 96%             |
|                        | Publish as success                            | 84%            | 88%             | 92%               | 85%                  | 92%            | 86%            | 92%             |
|                        | Collaborative                                 | 96%            | 97%             | 100%              | 98%                  | 100%           | 100%           | 92%             |
|                        | Freedom and independence                      | 79%            | 86%             | 92%               | 88%                  | 85%            | 86%            | 85%             |
|                        | Persistent and resilient                      | 96%            | 97%             | 92%               | 98%                  | 92%            | 100%           | 96%             |
|                        | Open to new ideas                             | 99%            | 98%             | 100%              | 98%                  | 100%           | 100%           | 100%            |
| Values/<br>Beliefs     | Discovery                                     | 98%            | 97%             | 100%              | 98%                  | 100%           | 100%           | 92%             |
|                        | Empirical evidence                            | 93%            | 98%             | 100%              | 96%                  | 100%           | 100%           | 92%             |
|                        | Cannot answer all questions                   | 92%            | 95%             | 92%               | 94%                  | 92%            | 86%            | 92%             |
|                        | Durable but subject to change                 | 95%            | 95%             | 100%              | 98%                  | 100%           | 100%           | 100%            |
|                        | Curiosity/imagination                         | 96%            | 95%             | 100%              | 96%                  | 100%           | 100%           | 96%             |
|                        | Variety of methods                            | 100%           | 97%             | 100%              | 98%                  | 100%           | 100%           | 100%            |
|                        | Influence by/contributes to society           | 89%            | 91%             | 100%              | 92%                  | 100%           | 86%            | 92%             |

|                                |     |      |      |      |      |      |      |
|--------------------------------|-----|------|------|------|------|------|------|
| Builds on what has gone before | 99% | 100% | 100% | 100% | 100% | 100% | 100% |
| Constructive and complex       | 97% | 98%  | 100% | 98%  | 100% | 100% | 100% |

Table S6 Note: Survey respondents were given the option to choose multiple subdisciplines that applied to their biological research. To summarize these data, broad categories of subdisciplines were defined: Ecology, Evolution, and Behavior (EEB); Molecular, Cellular, Developmental Biology, and Genetics (MCDBG); Biochemistry (Biochem); Plant and Microbial Biology (PlantMicro); Computational Biology (Comp); Neuroscience (Neuro). Respondents who chose subdisciplines included in multiples categories are represented multiple times in this table. The ‘Other’ category includes more specific subdisciplines entered by survey participants such as immunology, forestry, and biology education.

Table S7: Proportion relevant by gender identity

| Category               | Aspect                                        | Gender identity  |               |                    |                      |                                        |                           |
|------------------------|-----------------------------------------------|------------------|---------------|--------------------|----------------------|----------------------------------------|---------------------------|
|                        |                                               | Woman<br>(n=101) | Man<br>(n=48) | Nonbinary<br>(n=4) | Transgender<br>(n=2) | Genderfluid/<br>Nonconforming<br>(n=2) | Not<br>disclosed<br>(n=4) |
| Practices              | Pose questions                                | 99%              | 100%          | 100%               | 100%                 | 100%                                   | 100%                      |
|                        | Plan investigations                           | 97%              | 100%          | 100%               | 100%                 | 100%                                   | 100%                      |
|                        | Run investigations                            | 90%              | 98%           | 75%                | 100%                 | 50%                                    | 100%                      |
|                        | Analyze data                                  | 99%              | 100%          | 100%               | 100%                 | 100%                                   | 100%                      |
|                        | Evaluate and interpret data                   | 100%             | 100%          | 100%               | 100%                 | 100%                                   | 100%                      |
|                        | Generate arguments, explanations, conclusions | 97%              | 98%           | 75%                | 100%                 | 100%                                   | 100%                      |
|                        | Negotiate and debate                          | 77%              | 83%           | 100%               | 50%                  | 50%                                    | 100%                      |
|                        | Produce representations                       | 86%              | 83%           | 75%                | 100%                 | 50%                                    | 100%                      |
|                        | Develop and use models                        | 95%              | 90%           | 100%               | 100%                 | 100%                                   | 100%                      |
|                        | Computational approaches                      | 88%              | 90%           | 100%               | 100%                 | 100%                                   | 75%                       |
|                        | Obtain and evaluate info                      | 100%             | 98%           | 100%               | 100%                 | 100%                                   | 100%                      |
|                        | Communication                                 | 100%             | 98%           | 50%                | 100%                 | 100%                                   | 100%                      |
|                        | Teamwork                                      | 96%              | 96%           | 100%               | 100%                 | 100%                                   | 100%                      |
| Norms/<br>Expectations | Objectivity                                   | 95%              | 96%           | 100%               | 100%                 | 100%                                   | 100%                      |
|                        | Integrity                                     | 98%              | 98%           | 100%               | 100%                 | 100%                                   | 100%                      |
|                        | Repeat investigations                         | 96%              | 96%           | 100%               | 100%                 | 100%                                   | 100%                      |
|                        | Peer reviewed                                 | 99%              | 100%          | 100%               | 100%                 | 100%                                   | 100%                      |
|                        | Publish as success                            | 83%              | 90%           | 100%               | 100%                 | 100%                                   | 100%                      |
|                        | Collaborative                                 | 97%              | 96%           | 100%               | 100%                 | 100%                                   | 100%                      |
|                        | Freedom and independence                      | 80%              | 88%           | 50%                | 100%                 | 50%                                    | 100%                      |
|                        | Persistent and resilient                      | 96%              | 98%           | 100%               | 100%                 | 100%                                   | 100%                      |
|                        | Open to new ideas                             | 100%             | 98%           | 100%               | 100%                 | 100%                                   | 100%                      |
| Values/<br>Beliefs     | Discovery                                     | 97%              | 98%           | 100%               | 100%                 | 100%                                   | 100%                      |
|                        | Empirical evidence                            | 97%              | 92%           | 75%                | 50%                  | 100%                                   | 100%                      |
|                        | Cannot answer all questions                   | 89%              | 96%           | 100%               | 100%                 | 100%                                   | 100%                      |
|                        | Durable but subject to change                 | 95%              | 98%           | 100%               | 100%                 | 100%                                   | 100%                      |
|                        | Curiosity/imagination                         | 97%              | 98%           | 75%                | 100%                 | 100%                                   | 100%                      |
|                        | Variety of methods                            | 98%              | 100%          | 100%               | 100%                 | 100%                                   | 100%                      |
|                        | Influence by/contributes to society           | 89%              | 92%           | 100%               | 100%                 | 100%                                   | 75%                       |
|                        | Builds on what has gone before                | 99%              | 100%          | 100%               | 100%                 | 100%                                   | 100%                      |
|                        | Constructive and complex                      | 98%              | 96%           | 100%               | 100%                 | 100%                                   | 100%                      |

Table S8: Proportion relevant by Race/Ethnicity

| Category               | Aspect                                        | Race/Ethnicity   |                  |                |                |                                  |                           |
|------------------------|-----------------------------------------------|------------------|------------------|----------------|----------------|----------------------------------|---------------------------|
|                        |                                               | White<br>(n=130) | Latinx<br>(n=10) | Asian<br>(n=6) | Black<br>(n=1) | Multi-<br>racial/ethnic<br>(n=7) | Not<br>disclosed<br>(n=7) |
| Practices              | Pose questions                                | 99%              | 100%             | 100%           | 100%           | 100%                             | 100%                      |
|                        | Plan investigations                           | 98%              | 100%             | 100%           | 100%           | 100%                             | 100%                      |
|                        | Run investigations                            | 91%              | 100%             | 100%           | 100%           | 86%                              | 100%                      |
|                        | Analyze data                                  | 99%              | 100%             | 100%           | 100%           | 100%                             | 100%                      |
|                        | Evaluate and interpret data                   | 100%             | 100%             | 100%           | 100%           | 100%                             | 100%                      |
|                        | Generate arguments, explanations, conclusions | 96%              | 100%             | 100%           | 100%           | 100%                             | 100%                      |
|                        | Negotiate and debate                          | 80%              | 70%              | 83%            | 100%           | 71%                              | 86%                       |
|                        | Produce representations                       | 84%              | 90%              | 100%           | 100%           | 71%                              | 100%                      |
|                        | Develop and use models                        | 94%              | 80%              | 100%           | 100%           | 100%                             | 100%                      |
|                        | Computational approaches                      | 92%              | 70%              | 100%           | 100%           | 57%                              | 86%                       |
|                        | Obtain and evaluate info                      | 99%              | 100%             | 100%           | 100%           | 100%                             | 100%                      |
|                        | Communication                                 | 98%              | 100%             | 100%           | 100%           | 100%                             | 100%                      |
|                        | Teamwork                                      | 97%              | 90%              | 100%           | 100%           | 86%                              | 100%                      |
| Norms/<br>Expectations | Objectivity                                   | 95%              | 100%             | 100%           | 100%           | 100%                             | 100%                      |
|                        | Integrity                                     | 99%              | 100%             | 100%           | 100%           | 86%                              | 100%                      |
|                        | Repeat investigations                         | 95%              | 100%             | 100%           | 100%           | 100%                             | 100%                      |
|                        | Peer reviewed                                 | 100%             | 90%              | 100%           | 100%           | 100%                             | 100%                      |
|                        | Publish as success                            | 86%              | 80%              | 83%            | 100%           | 86%                              | 100%                      |
|                        | Collaborative                                 | 98%              | 100%             | 83%            | 100%           | 86%                              | 100%                      |
|                        | Freedom and independence                      | 81%              | 100%             | 100%           | 100%           | 57%                              | 100%                      |
|                        | Persistent and resilient                      | 97%              | 100%             | 83%            | 100%           | 100%                             | 100%                      |
|                        | Open to new ideas                             | 99%              | 100%             | 100%           | 100%           | 100%                             | 100%                      |
| Values/<br>Beliefs     | Discovery                                     | 98%              | 90%              | 100%           | 100%           | 100%                             | 100%                      |
|                        | Empirical evidence                            | 94%              | 100%             | 100%           | 100%           | 86%                              | 100%                      |
|                        | Cannot answer all questions                   | 92%              | 90%              | 100%           | 100%           | 100%                             | 86%                       |
|                        | Durable but subject to change                 | 97%              | 90%              | 100%           | 100%           | 86%                              | 100%                      |
|                        | Curiosity/imagination                         | 96%              | 100%             | 100%           | 100%           | 100%                             | 100%                      |
|                        | Variety of methods                            | 99%              | 100%             | 100%           | 100%           | 100%                             | 100%                      |
|                        | Influence by/contributes to society           | 90%              | 100%             | 83%            | 100%           | 86%                              | 86%                       |
|                        | Builds on what has gone before                | 99%              | 100%             | 100%           | 100%           | 100%                             | 100%                      |
|                        | Constructive and complex                      | 97%              | 100%             | 100%           | 100%           | 100%                             | 100%                      |

Table S9: Proportion relevant by institution type

| Category               | Aspect                                        | Institution Type |                 |               |                  |              |                          |                |
|------------------------|-----------------------------------------------|------------------|-----------------|---------------|------------------|--------------|--------------------------|----------------|
|                        |                                               | R1<br>(n=81)     | R2/R3<br>(n=34) | PUI<br>(n=16) | Masters<br>(n=6) | MSI<br>(n=2) | Two or<br>more<br>(n=15) | Other<br>(n=7) |
| Practices              | Pose questions                                | 100%             | 97%             | 100%          | 100%             | 100%         | 100%                     | 100%           |
|                        | Plan investigations                           | 98%              | 97%             | 100%          | 100%             | 100%         | 100%                     | 100%           |
|                        | Run investigations                            | 91%              | 88%             | 100%          | 67%              | 100%         | 100%                     | 100%           |
|                        | Analyze data                                  | 100%             | 100%            | 100%          | 100%             | 100%         | 93%                      | 100%           |
|                        | Evaluate and interpret data                   | 100%             | 100%            | 100%          | 100%             | 100%         | 100%                     | 100%           |
|                        | Generate arguments, explanations, conclusions | 95%              | 97%             | 100%          | 100%             | 100%         | 100%                     | 100%           |
|                        | Negotiate and debate                          | 77%              | 82%             | 94%           | 17%              | 50%          | 100%                     | 86%            |
|                        | Produce representations                       | 84%              | 79%             | 94%           | 83%              | 100%         | 93%                      | 86%            |
|                        | Develop and use models                        | 94%              | 94%             | 94%           | 100%             | 100%         | 93%                      | 86%            |
|                        | Computational approaches                      | 93%              | 82%             | 88%           | 83%              | 100%         | 87%                      | 86%            |
|                        | Obtain and evaluate info                      | 99%              | 100%            | 100%          | 100%             | 100%         | 100%                     | 100%           |
|                        | Communication                                 | 98%              | 97%             | 100%          | 100%             | 100%         | 100%                     | 100%           |
| Teamwork               | 94%                                           | 100%             | 100%            | 83%           | 100%             | 100%         | 100%                     |                |
| Norms/<br>Expectations | Objectivity                                   | 96%              | 91%             | 100%          | 83%              | 100%         | 100%                     | 100%           |
|                        | Integrity                                     | 98%              | 100%            | 100%          | 100%             | 50%          | 100%                     | 100%           |
|                        | Repeat investigations                         | 95%              | 97%             | 94%           | 100%             | 100%         | 100%                     | 100%           |
|                        | Peer reviewed                                 | 100%             | 100%            | 100%          | 100%             | 100%         | 100%                     | 86%            |
|                        | Publish as success                            | 85%              | 94%             | 88%           | 67%              | 50%          | 87%                      | 85%            |
|                        | Collaborative                                 | 95%              | 100%            | 100%          | 100%             | 100%         | 100%                     | 86%            |
|                        | Freedom and independence                      | 77%              | 82%             | 94%           | 100%             | 50%          | 100%                     | 71%            |
|                        | Persistent and resilient                      | 96%              | 94%             | 100%          | 100%             | 100%         | 100%                     | 100%           |
|                        | Open to new ideas                             | 99%              | 100%            | 100%          | 100%             | 100%         | 100%                     | 100%           |
| Values/<br>Beliefs     | Discovery                                     | 98%              | 97%             | 100%          | 100%             | 100%         | 100%                     | 86%            |
|                        | Empirical evidence                            | 95%              | 94%             | 100%          | 83%              | 100%         | 100%                     | 71%            |
|                        | Cannot answer all questions                   | 91%              | 91%             | 94%           | 100%             | 100%         | 93%                      | 86%            |
|                        | Durable but subject to change                 | 95%              | 97%             | 100%          | 83%              | 100%         | 100%                     | 100%           |
|                        | Curiosity/imagination                         | 94%              | 100%            | 100%          | 100%             | 100%         | 100%                     | 100%           |
|                        | Variety of methods                            | 98%              | 100%            | 100%          | 100%             | 100%         | 100%                     | 100%           |
|                        | Influence by/contributes to society           | 90%              | 82%             | 100%          | 83%              | 100%         | 93%                      | 100%           |
|                        | Builds on what has gone before                | 99%              | 100%            | 100%          | 100%             | 100%         | 100%                     | 100%           |
|                        | Constructive and complex                      | 98%              | 97%             | 100%          | 83%              | 100%         | 100%                     | 100%           |

Table S9 Note: PUI = Primarily Undergraduate Institution; MSI = Minority-Serving Institution. The 'Other' category includes institutions such as government research labs or non-profits
